# Supplementary material
Source: publisher figshare collection journal article supplement (https://gsajournals.figshare.com/ndownloader/files/28547754)
Supplement: Supplementary file 1 [file 28547754]

## Sheet: Read Me
Supplemental Table 8. Mating type genes and others related to mating that are differentially expressed in a vs. a cells in WT and/or tup1(S649F).
Definition of columns in the tables:
ID = Systematic name
Gene Name = Common name
RNA Expression Summary = Main result from RNA-Seq
Tup1 Binding Summary = Main result from ChIP-Seq
RNA Expression, Log2 Fold Change = Log2 fold change between the samples indicated in each column
ChIP-Seq, Log2 Fold Enrichment = Log2 fold enrichment of Tup1 binding for the indicated strain
Triplicate samples for each genotype were averaged to obtain the numbers in these tables.
Log2 Fold Changes for RNA Expression are highlighted in pink if greater than 2-fold change increased expression.
Log2 Fold Changes for RNA Expression are highlighted in green if greater than 2-fold change decreased expression
ChIP Log2 Fold Enrichments of >0.4 are highlighted in yellow.

## Sheet: Table S8
Table S10. Differences in expression of mating type genes and other mating-related genes between tup1 null and tup1(S649F) in MATa cells.
				Chen et al, 2013	Current Study
				tup1 a	tup1(S649F) a
	ID	Gene Name	Description	vs. WT a	vs. WT a
a-specific Genes	YGL032C	AGA2	Adhesion subunit of a-agglutinin of a-cells	4.12574	7.5831
	YKL209C	STE6	a-factor membrane transporter	0.986286	4.12589
	YDR461W	MFA1	Mating pheromone a-factor	2.98315	7.01405
	YIL015W	BAR1	Protease that inactivates a-factor	0.668986	6.45041
	YFL026W	STE2	Receptor for a-factor pheromone	2.67056	6.39232
	YNL145W	MFA2	Mating pheromone a-factor	4.22996	8.42552
a-specific Genes	YPL187W	MF(ALPHA)1	Mating pheromone a-factor	-2.6864	0.159611
	YGL089C	MF(ALPHA)2	Mating pheromone a-factor	-5.87828	1.26933
	YKL178C	STE3	Receptor for a-factor pheromone	-2.76969	0.72234
	YLR040C	AFB1	MATa-specific a-factor blocker	-0.627961	0.0512323
	YJR004C	SAG1	a-agglutinin of a-cells	-2.6639	2.94341
	YDL039C	PRM7	Pheromone-regulated protein; predicted transmembrane protein	-0.448685	2.43395
	YDL037C	BSC1	Similar to cell surface flocculins	-1.5779	2.16494
Other Mating Genes	YBR040W	FIG1	Integral membrane protein required for efficient mating	-0.541443	7.72468
	YNL279W	PRM1	Pheromone-regulated multispanning membrane protein; involved in membrane fusion during mating	-0.863869	6.6655
	YIL037C	PRM2	Pheromone-regulated protein; required for efficient nuclear fusion	0.235006	6.11987
	YCR089W	FIG2	Cell wall adhesin, expressed specifically during mating	-0.282861	5.68156
	YCL027W	FUS1	Membrane protein localized to the shmoo tip; required for cell fusion	-2.30852	3.20084
	YNR044W	AGA1	Anchorage subunit of a-agglutinin of a-cells	-1.36097	4.51829
	YMR232W	FUS2	Cell fusion regulator; cytoplasmic protein localized to shmoo tip; alignment of parental nuclei before nuclear fusion during mating	-0.308138	3.44782
	YCL055W	KAR4	Transcription factor required for response to pheromones	-0.247055	2.46668
	YGL053W	PRM8	Pheromone-regulated protein; predicted transmembrane protein	-0.221515	2.56366
	YLR452C	SST2	GTPase-activating protein for Gpa1p; regulates desensitization to alpha factor pheromone	-2.44573	1.35062
	YPL156C	PRM4	Pheromone-regulated protein proposed to be involved in mating; predicted transmembrane protein	-0.602088	2.95108
	YMR065W	KAR5	Protein required for nuclear membrane fusion during karyogamy; expression of the gene is regulated by pheromone	-0.390824	2.00264
	YKL189W	HYM1	Component of the RAM signaling network; localizes to sites of polarized growth during budding and during the mating response	0.67899	1.40708
	YMR198W	CIK1	Kinesin-associated protein; required for both karyogamy and mitotic spindle organization	-0.376022	1.41477
	YIL117C	PRM5	Pheromone-regulated protein; predicted transmembrane protein	-0.255627	1.87389
	YBL016W	FUS3	Mitogen-activated serine/threonine protein kinase involved in mating	-0.144912	1.26934
	YGR032W	GSC2	Catalytic subunit of 1,3-beta-glucan synthase; involved in formation of the inner layer of the spore wall	0.353719	3.33122
	YJL157C	FAR1	CDK inhibitor and nuclear anchor; regulated in response to pheromone	-0.948605	1.08791
				Log2 Fold Increase >1.0 (2-fold)
				Log2 Fold Decrease <-1.0 (2-fold)
